# Supplementary material for: Genome-Wide Characterization of Endogenous Retroviruses in Bombyx mori Reveals the Relatives and Activity of env Genes
Source: Front Microbiol. 2018 Aug 3;9:1732. doi: 10.3389/fmicb.2018.01732 (PMC6085415; doi:10.3389/fmicb.2018.01732)
Supplement: DATA SHEET S3 — Census of BmERVs in the silkworm chromosome. [file Data_Sheet_3.XLSX]

## Sheet: Sheet1
class	chr1	chr2	chr3	chr4	chr5	chr6	chr7	chr8	chr9	chr10	chr11	chr12	chr13	chr14	chr15	chr16	chr17	chr18	chr19	chr20	chr21	chr22	chr23	chr24	chr25	chr26	chr27	chr28	Unlocated	all (%)/genome
ClassI	3.44	5.334	4.07	3.818	3.625	3.758	4.706	4.203	4.267	3.787	4.209	4.192	4.019	4.848	3.982	4.82	4.339	4.17	4.114	4.948	4.408	3.917	4.14	5.119	4.465	4.977	4.697	5.484	5.246	4.387
ClassII	0.003	0.005	0.001	0.005	0.003	0.003	0.012	0.005	0.004	0.004	0.002	0.004	0.006	0.006	0.006	0.044	0.004	0.005	0.009	0	0.006	0.035	0.016	0.003	0.009	0.004	0.061	0	0.028	0.011
ClassIII	2.659	5.23	3.492	3.141	3.317	3.34	3.899	3.461	3.416	3.076	3.531	3.514	3.326	3.759	3.369	4.026	3.594	3.727	3.676	4.289	3.624	3.303	3.656	4.799	3.72	4.696	4.33	4.716	3.031	3.561
Unclassified	13.954	23.368	16.708	14.657	15.38	15.841	18.316	17.251	16.443	15.417	17.17	16.599	15.788	19.249	16.328	18.683	17.304	17.408	17.187	19.893	17.383	15.964	17.397	21.662	17.31	20.699	18.925	22.162	19.86	17.604
Total (%)	20.056	33.937	24.271	21.621	22.325	22.942	26.933	24.92	24.13	22.284	24.912	24.309	23.139	27.862	23.685	27.573	25.241	25.31	24.986	29.13	25.421	23.219	25.209	31.583	25.504	30.376	28.013	32.362	28.165	25.563
